# Supplementary material for: The tunable pReX expression vector enables optimizing the T7-based production of membrane and secretory proteins in E. coli
Source: PubMed Central journal article supplement (PMC5732464; doi:10.1186/s12934-017-0840-4), 2017-12-16

**Supplementary Table 1: The primers used in this study.**

| Primer name              | Primer sequence                             | Primer description                                                                        |
|--------------------------|---------------------------------------------|-------------------------------------------------------------------------------------------|
| P57_KpnIMod_fw           | 5'- ATATATGGTACCTCGCCGAAAATGACCCAG-3'       | Forward primer to introduce a <i>KpnI</i> restriction site in the pMOD fragment of pReX   |
| P58_EagIMod_rv           | 5'- ATATATCGGCCGTCAAGAAGATCCTTTGATCTTTTC-3' | Reverse primer to introduce an <i>EagI</i> restriction site in the pMOD fragment of pReX  |
| P59_EagILemo_fw          | 5'- ATATATCGGCCGTACAGGTATTTATTCGGC-3'       | Forward primer to introduce an <i>EagI</i> restriction site in the pLemo fragment of pReX |
| P60_KpnILemo_rv          | 5'- ATATATGGTACCAGGGCAGGGTCGTAAATAG-3'      | Reverse primer to introduce a <i>KpnI</i> restriction site in the pLemo fragment of pReX  |
| pLemoMOD_pMB<br>1_ins_fw | 5'- ACACCCCTTGTATTACTGTTTATG-3'             | Forward primer to amplify the pMB1 origin of replication                                  |
| pLemoMOD_pMB<br>1_ins_rv | 5'- CTGACTTCAGGTGCCTGTGGAACACCTACATC-3'     | Reverse primer to amplify the pMB1 origin of replication                                  |
| pLemoMOD_Vec_<br>p15A_fw | 5'- CACCTGAAGTCAGCCCC-3'                    | Forward primer to amplify the vector backbone of pReX                                     |
| pLemoMOD_Vec_<br>p15A_rv | 5'- CATAAACAGTAATACAAGGGGTGT-3'             | Reverse primer to amplify the vector backbone of pReX                                     |
| pET-T7-Ins_fw            | 5'- ATTAATACGACTCACTATAGGG-3'               | Forward primer to subclone target genes into pReX                                         |
| pET-Ter-Ins_rv           | 5'- ATCCGGATATAGTTCCTCC-3'                  | Reverse primer to subclone target genes into pReX                                         |
| pET-Ter-Vec_fw           | 5'- GGAGGAACTATATCCGGAT-3'                  | Forward primer to amplify the vector backbone of pReX                                     |
| pET-T7-Vec_rv            | 5'- CCCTATAGTGAGTCGTATTAAT-3'               | Reverse primer to amplify the vector backbone of pReX                                     |

**Supplementary Figure 1: Flow cytometry-based analysis of GltP-GFP and secreted SfGFP production.** BL21(DE3) cells harboring a pReX expression vector with either *gltPgfp* or *dsbA\*sfgfp* and Lemo21(DE3) cells harboring a pET expression vector with either *gltPgfp* or *dsbA\*sfgfp* were cultured in LB medium at 30°C at varying L-rhamnose concentrations. Cells were induced with IPTG as described in the Methods section. **A.** Using flow cytometry the amount of GltP-GFP fusion produced in the cytoplasmic membrane per cell was assessed. Traces of BL21(DE3)/pReX*gltpgfp* and Lemo21(DE3)/pET*gltpgfp* cells cultured at the optimal L-rhamnose concentration (maximal amount of fluorescent protein per milliliter of culture) are in red and black (dotted), respectively. The trace of the BL21(DE3)/pReX*gltpgfp* cells cultured in the absence of L-rhamnose (0 µM L-rhamnose; control) is in light gray. The trace of the BL21(DE3)/pReX*gltpgfp* cells cultured in the presence of a suboptimal concentration of L-rhamnose (500 µM L-rhamnose; control) is in dark gray. Cells were isolated 8 h after the addition of IPTG. **B.** Using flow cytometry the amount of SfGFP produced in the periplasm per cell was assessed. Traces of BL21(DE3)/pReX*dsbA\*sfgfp* and Lemo21(DE3)/pET*dsbA\*sfgfp* cells cultured at the optimal L-rhamnose concentration (maximal amount of fluorescent protein per milliliter of culture) are in red and black (dotted), respectively. The trace of the BL21(DE3)/pReX*dsbA\*sfgfp* cells cultured in the absence of L-rhamnose (0 µM L-rhamnose; control) is in light gray. The trace of the BL21(DE3)/pReX*gltpgfp* cells cultured in the presence of a suboptimal concentration of L-rhamnose (5000 µM L-rhamnose; control) is in dark gray. The trace of the Lemo21(DE3)/pET*dsbA\*sfgfp* cells cultured in the absence of L-rhamnose (0 µM L-rhamnose; control) is in blue. Cells were isolated 4 h after the addition of IPTG.

A

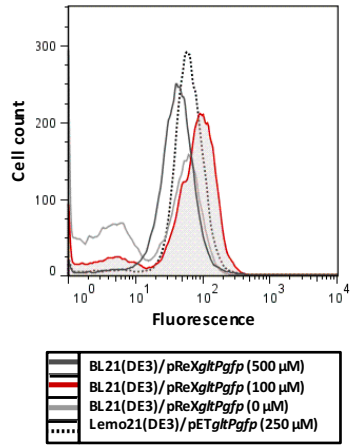

B

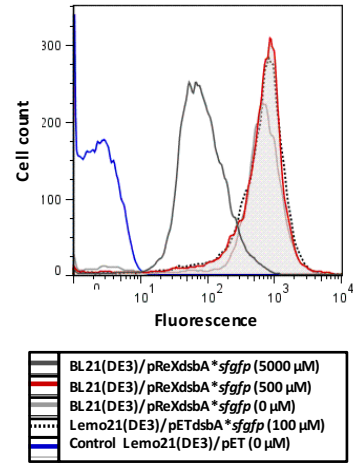

Supplementary Figure 2: Color version of Figure 4C.

A

BL21(DE3)/pReXdsbA \*sfgfp

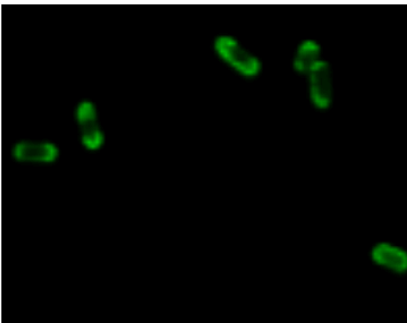

B

Lemo21(DE3)/pETSfgfp

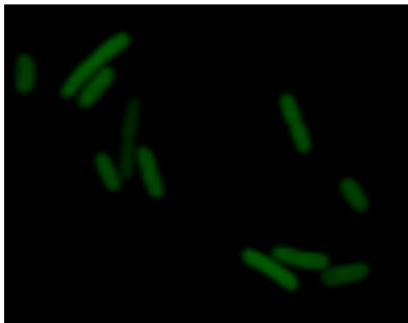

Supplement: 12934_2017_840_MOESM1_ESM.pdf [file 12934_2017_840_MOESM1_ESM.pdf]
